# Supplementary material for: Risk Indicators Improve the Prescription Quality of Drugs with Anticholinergic Properties in Nursing Homes
Source: MDPI journal article supplement (doi:10.3390/ijerph19010423), 2021-12-31
Supplement: s1 [file s1]

**Figure S1:** Example of communication 1 displayed in the common areas





“ Notre vigilance collective est la meilleure des préventions. Nous vous remercions pour votre implication. ”

### DÉMASQUER LES ANTICHOLINERGIQUES

#### LES EFFETS SECONDAIRES DES ANTICHOLINERGIQUES

Les médicaments anticholinergiques peuvent avoir un impact majeur chez les personnes âgées. Ils déclenchent ou majorent des troubles graves :



#### COMMENT DÉMASQUER LES ANTICHOLINERGIQUES ?

4 classes médicamenteuses

Les anticholinergiques masqués se retrouvent le plus souvent dans les classes médicamenteuses suivantes :

- Anxiolytiques
- Antipsychotiques
- Antidépresseurs
- Antihistaminiques



#### DES ALTERNATIVES THÉRAPEUTIQUES EXISTENT

Les outils à votre disposition :



livret du médicament Korian



brochure



outil de recherche d'alternatives

COLLECTIF BON USAGE DU MÉDICAMENT



**Figure S2:** Example of communication 2 displayed in the common areas

# DÉMASQUER LES ANTICHOLINERGIQUES

## Comment les démasquer ?

### 4 classes médicamenteuses

Les anticholinergiques masqués se retrouvent le plus souvent dans les classes médicamenteuses suivantes :

Anxiolytiques  
Antipsychotiques  
Antidépresseurs  
Antihistaminiques

## Les effets secondaires des Anticholinergiques

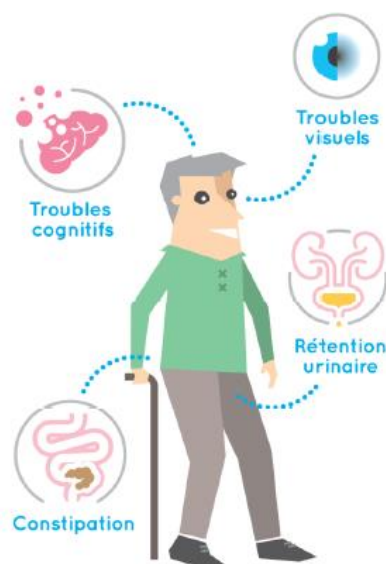

« Notre vigilance collective est la meilleure des préventions.  
Nous vous remercions pour votre implication. »

### COLLECTIF BON USAGE DU MÉDICAMENT

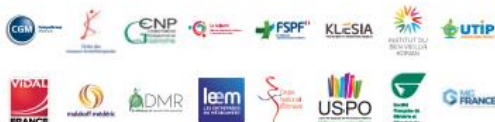

### DES ALTERNATIVES THÉRAPEUTIQUES EXISTENT RAPPROCHEZ-VOUS DU MÉDECIN COORDONNATEUR

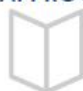

livret du  
médicament  
Korian

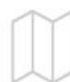

brochure

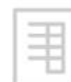

outil de recherche  
d'alternatives

**Table S1:** Example of quality indicators sent to the nursing homes in the intervention group every month.

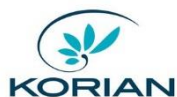

DemAsCH Study

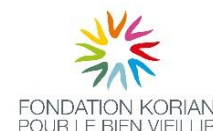

## Key Indicators - February 2019

| Indicator                                                           | Result for your centre |
|---------------------------------------------------------------------|------------------------|
| Proportion of nursing home residents receiving anticholinergics (%) | 16                     |
| Number of residents who received at least one anticholinergic drug  | 16                     |
| Number of residents on site                                         | 101                    |
| Average number of anticholinergics per resident                     | 2.00                   |
| Average number of prescriptions per resident                        | 2.52                   |

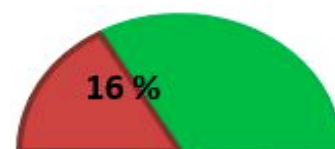

Use by molecule: In colour, the most prescribed anticholinergic drugs

|                |            |   |       |
|----------------|------------|---|-------|
| HYDROXYZINE    | ATARAX®    | 0 | 0.00% |
| CHLORPROMAZINE | LARGACTIL® | 0 | 0.00% |
| LEVOMEPRMAZINE | NOZINAN®   | 1 | 6.25% |

|                     |                  |   |        |
|---------------------|------------------|---|--------|
| CYAMEMAZINE         | TERCIAN®         | 1 | 6.25%  |
| PERICIAZINE         | NEULEPTIL®       | 0 | 0.00%  |
| CLOZAPINE           | LEPONEX®         | 0 | 0.00%  |
| CLOMIPRAMINE        | ANAFRANIL®       | 0 | 0.00%  |
| AMITRIPTYLINE       | ELAVYL®/LAROXYL® | 2 | 12.50% |
| ALIMEMAZINE         | THERALENE®       | 0 | 0.00%  |
| OXOMEMAZINE         | TOPLEXIL®        | 0 | 0.00%  |
| MEQUITAZINE         | PRIMALAN®        | 0 | 0.00%  |
| DEXCHLORPHENIRAMINE | POLARAMINE®      | 0 | 0.00%  |

**Figure S3 :** Constitution of the propensity score groups

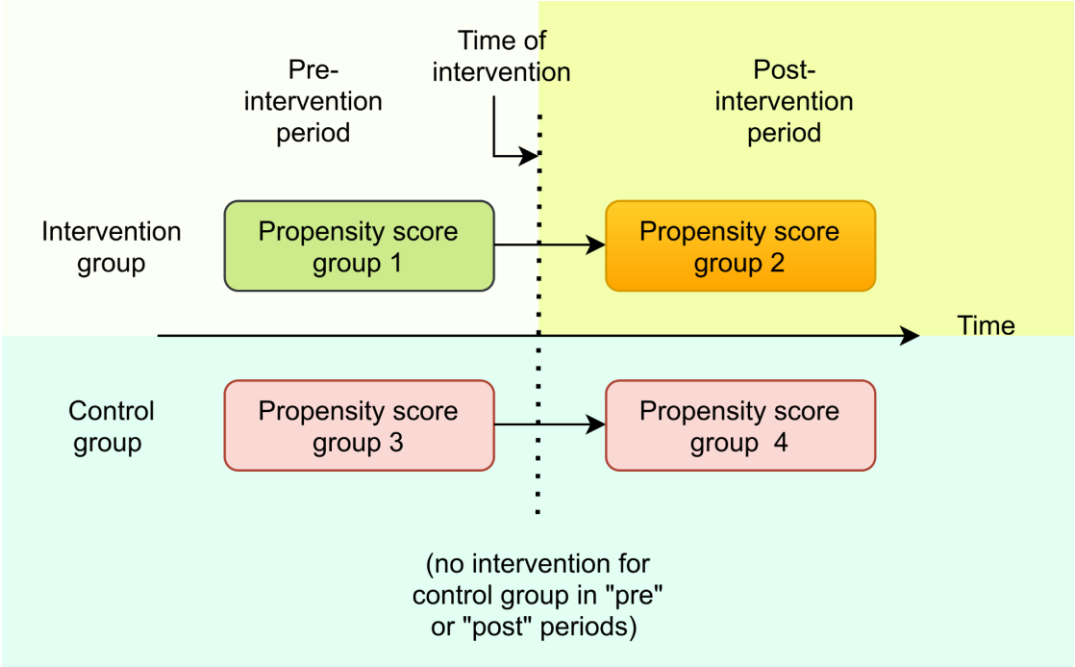

**Table S2:** Balance of the covariates before and after the propensity-score weighting

|                                                  | Unweighted Standardized Difference in Means |                     |                     | Weighted Standardized Difference in Means |                    |                    |
|--------------------------------------------------|---------------------------------------------|---------------------|---------------------|-------------------------------------------|--------------------|--------------------|
|                                                  | Group 1* vs Group 2†                        | Group 1 vs Group 3‡ | Group 1 vs Group 4§ | Group 1 vs Group 2                        | Group 1 vs Group 3 | Group 1 vs Group 4 |
| <b>Age (<math>\geq 80</math>)</b>                | 0.010                                       | 0.059               | 0.030               | 0.014                                     | 0.001              | 0.042              |
| <b>Sex</b>                                       | 0.040                                       | 0.068               | 0.063               | 0.027                                     | 0.005              | 0.013              |
| <b>Mortality</b>                                 | 0.014                                       | 0.148               | 0.322               | 0.002                                     | 0.154              | 0.122              |
| <b>Number of beds</b>                            | 0.005                                       | 0.218               | 0.232               | 0.124                                     | 0.048              | 0.086              |
| <b>Medical full-time equivalents per bed</b>     | 0.237                                       | 0.378               | 0.408               | 0.046                                     | 0.243              | 0.228              |
| <b>Non-medical full-time equivalents per bed</b> | 0.037                                       | 0.522               | 0.556               | 0.086                                     | 0.255              | 0.224              |
| <b>Bed occupancy</b>                             | 0.485                                       | 0.364               | 0.681               | 0.360                                     | 0.150              | 0.054              |
| <b>Absenteeism</b>                               | 0.475                                       | 0.083               | 0.095               | 0.145                                     | 0.045              | 0.004              |

\*Group 1: Intervention group before intervention; †Group 2: Intervention group after intervention; ‡Group 3: Control group before intervention; §Group 4: Control group after intervention

**Figure S4:** Balance plot before and after the intervention periods.

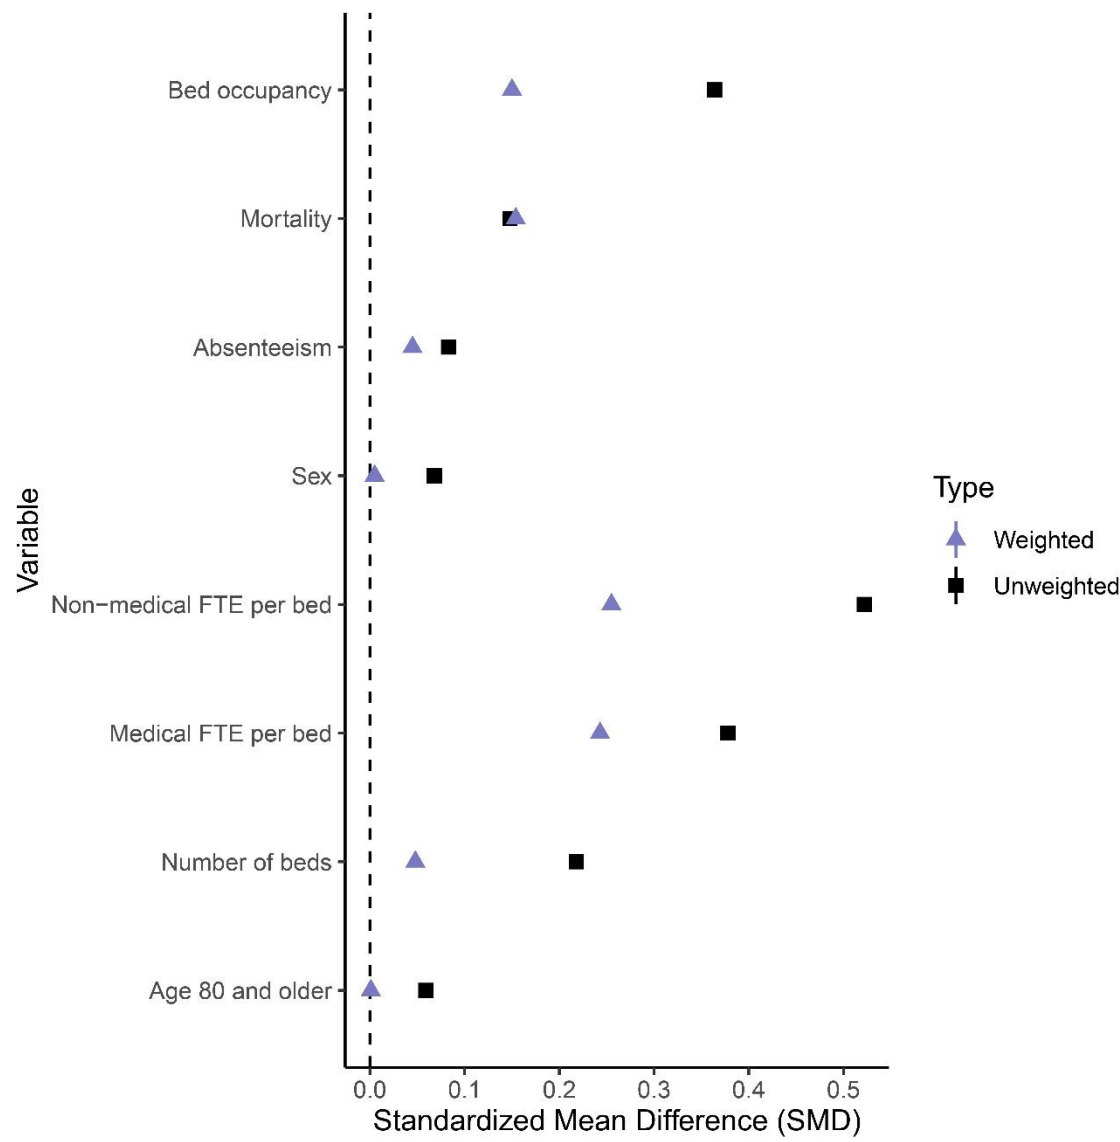

**Table S3:** Supplementary anticholinergic prescription indicators (aggregated over 18-month periods).

|                                                                     | Intervention |         | Control |         |
|---------------------------------------------------------------------|--------------|---------|---------|---------|
| Group                                                               | Before       | After   | Before  | After   |
| Number of distinct patients <sup>a</sup>                            | 1656         | 1706    | 3499    | 3632    |
| Number of prescriptions <sup>a</sup>                                | 139 578      | 130 657 | 320 284 | 319 289 |
| Distinct patients with anticholinergic medication <sup>a</sup>      | 210          | 154     | 500     | 467     |
| Total anticholinergic prescriptions <sup>a</sup>                    | 1871         | 1239    | 5152    | 4714    |
| Proportion of patients with $\geq 1$ anticholinergic <sup>a</sup>   | 0.127        | 0.090   | 0.143   | 0.129   |
| Average number of anticholinergics per resident <sup>a</sup>        | 1.13         | 0.73    | 1.47    | 1.30    |
| Average number of prescriptions per resident per month <sup>a</sup> | 4.68         | 4.25    | 5.09    | 4.88    |

<sup>a</sup> Aggregated over 18 months before and after intervention.



## **Availability of Study Material**

The booklet describing the appropriate use of medications among older nursing home residents (Livret du médicament: Pour un bon usage chez la personne âgée; 3<sup>e</sup> édition; 2016) is available in French on request from the corresponding author or from the Korian Foundation.

Conversely, the aid for substitution of drugs, and the list of alternative drugs is a proprietary tool developed by the Korian group. Data can be made available on reasonable written request to the corresponding author.

**Table S4 : STROBE Statement—checklist of items that should be included in reports of observational studies**

|                              | <b>Item No.</b> | <b>Recommendation</b>                                                                                                                                                                | <b>Page No.</b> |
|------------------------------|-----------------|--------------------------------------------------------------------------------------------------------------------------------------------------------------------------------------|-----------------|
| <b>Title and abstract</b>    | 1               | (a) Indicate the study’s design with a commonly used term in the title or the abstract                                                                                               | 1<br>(abstract) |
|                              |                 | (b) Provide in the abstract an informative and balanced summary of what was done and what was found                                                                                  | 1<br>(abstract) |
| <b>Introduction</b>          |                 |                                                                                                                                                                                      |                 |
| Background/rationale         | 2               | Explain the scientific background and rationale for the investigation being reported                                                                                                 | 1-2             |
| Objectives                   | 3               | State specific objectives, including any prespecified hypotheses                                                                                                                     | 2               |
| <b>Methods</b>               |                 |                                                                                                                                                                                      |                 |
| Study design                 | 4               | Present key elements of study design early in the paper                                                                                                                              | 2               |
| Setting                      | 5               | Describe the setting, locations, and relevant dates, including periods of recruitment, exposure, follow-up, and data collection                                                      | 2-4             |
| Participants                 | 6               | (a) <i>Cohort study</i> —Give the eligibility criteria, and the sources and methods of selection of participants. Describe methods of follow-up                                      | 2-4             |
| Variables                    | 7               | Clearly define all outcomes, exposures, predictors, potential confounders, and effect modifiers. Give diagnostic criteria, if applicable                                             | 2-4             |
| Data sources/<br>measurement | 8*              | For each variable of interest, give sources of data and details of methods of assessment (measurement). Describe comparability of assessment methods if there is more than one group | 4-5             |
| Bias                         | 9               | Describe any efforts to address potential sources of bias                                                                                                                            | 5               |
| Study size                   | 10              | Explain how the study size was arrived at                                                                                                                                            | Not applicable  |

Continued on next page

|                        |     |                                                                                                                                                                                                              |               |
|------------------------|-----|--------------------------------------------------------------------------------------------------------------------------------------------------------------------------------------------------------------|---------------|
| Quantitative variables | 11  | Explain how quantitative variables were handled in the analyses. If applicable, describe which groupings were chosen and why                                                                                 | 4-5           |
| Statistical methods    | 12  | (a) Describe all statistical methods, including those used to control for confounding                                                                                                                        | 5             |
|                        |     | (b) Describe any methods used to examine subgroups and interactions                                                                                                                                          | N/A           |
|                        |     | (c) Explain how missing data were addressed                                                                                                                                                                  | 5             |
|                        |     | (d) <i>Cohort study</i> —If applicable, explain how loss to follow-up was addressed                                                                                                                          | N/A           |
|                        |     | (e) Describe any sensitivity analyses                                                                                                                                                                        | N/A           |
| Participants           | 13* | (a) Report numbers of individuals at each stage of study—eg numbers potentially eligible, examined for eligibility, confirmed eligible, included in the study, completing follow-up, and analysed            | 5-6           |
|                        |     | (b) Give reasons for non-participation at each stage                                                                                                                                                         | 6             |
|                        |     | (c) Consider use of a flow diagram                                                                                                                                                                           | Figure 1, p6  |
| Descriptive data       | 14* | (a) Give characteristics of study participants (eg demographic, clinical, social) and information on exposures and potential confounders                                                                     | Table 1, p6-7 |
|                        |     | (b) Indicate number of participants with missing data for each variable of interest                                                                                                                          | 6             |
|                        |     | (c) <i>Cohort study</i> —Summarise follow-up time (eg, average and total amount)                                                                                                                             | 5-7, Figure 2 |
| Outcome data           | 15* | <i>Cohort study</i> —Report numbers of outcome events or summary measures over time                                                                                                                          | 5-7, Figure 2 |
| Main results           | 16  | (a) Give unadjusted estimates and, if applicable, confounder-adjusted estimates and their precision (eg, 95% confidence interval). Make clear which confounders were adjusted for and why they were included | 7-8           |
|                        |     | (b) Report category boundaries when continuous variables were categorized                                                                                                                                    | 7-8           |
|                        |     | (c) If relevant, consider translating estimates of relative risk into absolute risk for a meaningful time period                                                                                             | 7-8           |

Continued on next page

|                          |    |                                                                                                                                                                            |     |
|--------------------------|----|----------------------------------------------------------------------------------------------------------------------------------------------------------------------------|-----|
| Other analyses           | 17 | Report other analyses done—eg analyses of subgroups and interactions, and sensitivity analyses                                                                             | N/A |
| Key results              | 18 | Summarise key results with reference to study objectives                                                                                                                   | 5-8 |
| Limitations              | 19 | Discuss limitations of the study, taking into account sources of potential bias or imprecision. Discuss both direction and magnitude of any potential bias                 | 5-6 |
| Interpretation           | 20 | Give a cautious overall interpretation of results considering objectives, limitations, multiplicity of analyses, results from similar studies, and other relevant evidence | 10  |
| Generalisability         | 21 | Discuss the generalisability (external validity) of the study results                                                                                                      | 10  |
| <b>Other information</b> |    |                                                                                                                                                                            |     |
| Funding                  | 22 | Give the source of funding and the role of the funders for the present study and, if applicable, for the original study on which the present article is based              | 10  |
